20 SUMMARY

21 The magnetic field, the sun, the stars and the polarization pattern of visible light  
22 during twilight are important cues for orientation in nocturnally migrating songbirds.  
23 As these cues change with time and location on Earth, the polarization pattern was  
24 put forward as a likely key reference system calibrating the other compass systems.  
25 Whether this applies generally to migratory birds is, however, controversially  
26 discussed. We used an experimental approach in free-flying birds to study the role of  
27 polarization for their departure direction in autumn. Experimental birds experienced a  
28 90° shift of the band of maximum polarization during sunset, whereas control-birds  
29 experienced the polarization pattern as under natural condition. Full view of the  
30 sunset cues near the horizon was provided during the cue conflict exposure. Here we  
31 show both the experimental and the control-birds being released after nautical  
32 twilight departed consistently towards south-southeast. Radio telemetry allowed  
33 tracking first 15 km of birds' way out, thus the intrinsic migration direction as chosen  
34 by the birds was measured. We found no recalibration of the magnetic compass after  
35 pre-exposure to a cue conflict between the natural magnetic field and the artificially  
36 shifted polarization pattern at sunset. The lacking difference in the departure direction  
37 of both groups may suggests that birds did not recalibrate any of the compass  
38 systems during the experiment. As free-flying migrants can use all available  
39 orientation cues after release, it remains unknown whether our birds might have used  
40 the magnetic and/or star compass to determine their departure direction.

41

42 **Key words:** cue conflict, magnetic compass, migration, orientation, polarization pattern,  
43 radio telemetry, songbirds, star compass

44 INTRODUCTION

45 Migrating birds use different cues for orientation, including the magnetic field of the Earth  
46 (Wiltschko and Wiltschko, 1972), the position of the sun at sunset (Moore, 1987; Schmidt-  
47 Koenig, 1990), light polarization patterns around sunset and sunrise (Able, 1982; Phillips and  
48 Moore, 1992; Able and Able, 1993; Muheim et al., 2006b) and the position of the stars  
49 (Wagner and Sauer, 1957; Wiltschko and Wiltschko, 1978), see also reviews by (Muheim et  
50 al., 2006a; Wiltschko and Wiltschko, 2009). Since cue availability changes depending on a  
51 bird's location on the Earth, time of day and season, it seems likely that the multiple compass  
52 systems are regularly calibrated by a common reference system (Cochran et al., 2004;  
53 Muheim et al., 2006a; Muheim et al., 2006b), thus that one of the multiple compasses is  
54 dominant over the others. The polarization pattern during twilight has been proposed as a  
55 candidate cue for the key reference system against which the other compass systems are  
56 calibrated (Muheim et al., 2006b; Muheim et al., 2007; Muheim et al., 2008). However, it  
57 remains unclear how universal this calibration strategy is (Wiltschko et al., 2008a; Wiltschko  
58 et al., 2008b; Gaggini et al., 2010; Chernetsov et al., 2011).

59 To our knowledge, only three studies (Sandberg et al., 2000; Cochran et al., 2004;  
60 Chernetsov et al., 2011) have monitored free-flying birds to test the orientation of birds, i.e.,  
61 to track the departure directions after exposure to a cue conflict over the first part of their  
62 journey. In addition Emlen and Demong (1978) found that birds released at migratory altitude  
63 under clear sky condition flew in a straight line towards the seasonally appropriate migration  
64 direction, whereas the concentration of birds' tracks was reduced under overcast situation. The  
65 major advantages of tracking free-flying birds over Emlen funnel experiments are that (1)  
66 Emlen funnel's drawbacks are overcome, (2) free-flying birds can phenotypically respond to  
67 the environmental cues after the experiment during the departure, (3) the intrinsic migration  
68 direction as chosen by the birds is detected, and (4) they move through space (Emlen and  
69 Emlen, 1966; Nievergelt et al., 1999; Nievergelt and Liechti, 2000; Chernetsov et al., 2011).

70 Here, we test whether a 90° shift of the band of maximum polarization during sunset  
71 determines the departure direction of a free-flying nocturnal songbird migrant, the northern  
72 wheatear (*Oenanthe oenanthe* Linnaeus 1758, wheatear hereafter). Under the general  
73 hypothesis that the polarization pattern at sunset and sunrise is a reference cue to adjust  
74 alternative compass systems, we hypothesized that such a 90° shift of the band of maximum  
75 polarization affects the birds' departure direction by on average of 90° in comparison to  
76 control birds (Fig. 1).

77

78

## 79 MATERIALS AND METHODS

### 80 Study site and study species

81 The study was carried out on Helgoland, Germany, a small island (54°11'N, 07°55'E) in the  
82 North Sea, during autumn migration 2008 (06.09.–6.10.) and 2009 (22.08.–29.09.). Its  
83 distance to the nearest land is approximately 50 km in easterly to southerly directions. Thus,  
84 birds having left the island can be considered as having resumed migration. Because of its  
85 small size, the presence and absence of radio-tagged birds on the island can easily be  
86 determined, and nocturnal exploratory flights are not misinterpreted as departure events  
87 (Schmaljohann et al., 2011).

88 The wheatear is a nocturnal migrant (Schmaljohann et al., 2011; Schmaljohann and  
89 Naef-Daenzer, 2011) and regularly occurs on the island during autumn migration  
90 (Schmaljohann and Dierschke, 2005), but is not a regular breeding species there (Dierschke et  
91 al., 2011). Therefore, all wheatears on the island can be treated as migrants. The birds were  
92 caught with spring traps baited with mealworms (*Tenebrio molitor* Linnaeus 1758), measured  
93 (wing length to the nearest 0.25 mm), weighted to the nearest 0.25 g using a Pesola balance  
94 (Pesola AG, Switzerland), and banded with individual combinations of one reddish anodized  
95 aluminium ring and four colour-rings. Age was estimated from the colour of the inner upper  
96 mandible (Svensson, 1992). We considered only first-year birds to avoid any age effect and  
97 we did not distinguish between subspecies, since both can be assumed to migrate in the same  
98 southerly direction from Helgoland in autumn (Zink, 1973; Dierschke, et al. 2011).

99

### 100 Housing

101 The birds were kept indoors for several days (mean±s.d., 5±2 days) in separate cages (45.0 ×  
102 34.0 × 23.5 cm) in a room at the Institute of Avian Research. The windows were covered with  
103 baking parchments allowing birds to perceive the natural light conditions, but to prevent them  
104 from receiving any information on the polarization pattern. Up to eight birds were stationed  
105 simultaneously in the room. Mealworms and water were provided *ad libitum*. The wheatears  
106 usually started feeding within several minutes after we had left the room as revealed by video  
107 recording. Each morning (8.00–9.00 am) and evening (5.30–6.30 pm) the birds were weighted  
108 and their fat score (Kaiser, 1993) and muscle score (Bairlein, 1994) determined. If a bird lost  
109 weight during the day, it was not considered for the experiment and immediately released.

110

### 111 Experimental procedure

112 Experiments were only carried out on evenings with “good” migration conditions. We used  
113 the free available weather forecast program windfinder ([www.windfinder.com](http://www.windfinder.com)) to predict  
114 weather conditions on evenings and selected nights with no rain and with predicted wind  
115 speed of less than  $7 \text{ m s}^{-1}$ . Stronger winds are supposed to be assessed to be unfavourable by  
116 migratory birds (Erni et al., 2002). Cloudiness of sky was not considered as the polarization  
117 pattern is also visible when overcast (Hegedüs et al., 2007). Time and azimuth of local sunset  
118 was taken from SunEarthTools ([www.sunearthtools.com](http://www.sunearthtools.com)) with settings for Helgoland.

119 When all of the above criteria were met, we selected two birds in good and similar  
120 body condition, i.e., fat ( $\geq 3$ ) and muscle score ( $\geq 2$ ), for the night’s experiment, see result  
121 section for further details about the birds’ body condition. We attached a radio transmitter to  
122 each bird about two hours before sunset (see Radio tracking below) and placed one of the  
123 birds into the cardboard box of the experiment-cage and the other into the cardboard box of  
124 the control-cage (see Exposure cages below). Each cage was covered with a cloth, allowing  
125 the birds to accustom to the conditions for about 45 min. They were then transported, still  
126 covered, to the exposure site ( $54^{\circ}11'13''\text{N}$ ,  $7^{\circ}52'30''\text{E}$ ) on a short-grassy hilltop (Fig. 2).  
127 From there, the birds had a panoramic view of the horizon, slightly interfered by the highest  
128 peak of the island, the Pinneberg (azimuth:  $150\text{--}160^{\circ}$ ) and a small building (azimuth:  $295\text{--}$   
129  $305^{\circ}$ ).

130 There, the cages were placed horizontally and in a distance of 5 m from each other on  
131 top of the hill and aligned relative to the sunset azimuth, as described below (see Exposure  
132 cages). 30 min before sunset, the cages were uncovered and at least two persons surveyed the  
133 cages from a distance of 50–100 m to detect any type of disturbance, which never occurred.  
134 The birds were released out of the cages when the sun’s elevation was lower than  $13.7^{\circ}$  below  
135 the horizon, i.e., after nautical twilight, so that stars, when not cloudy, were visible and the  
136 skylight polarization pattern had disappeared, see Cochran et al. (2004) and Chernetsov et al.  
137 (2011). The birds were then held in the open hand, so that they could decide by themselves  
138 when and into which direction to depart. This lasted no longer than 5 min. The direction of  
139 the hand and birds’ alignment on the hand were randomized. Radio tracking started the  
140 moment the birds had taken off (see below).

141

#### 142 Exposure cages

143 Two cardboard boxes (30 x 32 x 32 cm) had net-covered windows (14 x 14 cm) on all four  
144 side walls. Each cardboard box was placed centrally into a larger wooden box (45 x 62 x 39  
145 cm, exposure cage) with the windows congruent with the windows of the cardboard boxes

146 (Fig. 2). All windows of the wooden boxes were covered on the outside with a pseudo-  
147 depolarizing filter (two sheets of Hostaphan polyethylene terephthalate, Hoechst AG,  
148 Germany, aligned at an angle of  $45^\circ$  relative to each other, resulting in a depolarization of  
149 90% with a 10–15% reduction of light intensity between 400 and 800 nm) as described in the  
150 supporting online material by Muheim et al. (2006b). Thereby, we minimized effects on light  
151 intensity changes caused by the interaction of the polarizing filters with the natural skylight  
152 polarization. On the inside, the windows were covered with polarizing filters (linear polarizer  
153 #POA1, 3Dlens Corporation, Taiwan, transmittance 38%, polarizing efficiency 99.98% at  
154 wavelengths  $\sim 400\text{--}700\text{nm}$ ).

155 In the control-cage, the polarizing filters were aligned so that the e-vector of  
156 polarization simulated a polarization pattern that was in agreement with the natural condition  
157 where the band of maximum polarization crosses the zenith at an angle of  $90^\circ$  relative to the  
158 azimuth of the sun (Muheim et al., 2006b). The e-vectors of the polarization filters in the two  
159 windows on the longitudinal axis (“northern” and “southern” window) were aligned  
160 vertically, while the e-vectors on the lateral axis (“western” and “eastern” window) were  
161 aligned horizontally, see supporting online material by Muheim et al. (2006b). Thus, the birds  
162 experienced an artificial band of maximum polarization crossing the sky at  $90^\circ$  from the sun,  
163 approximately going from “North” to “South”.

164 In the experiment-cage, the polarization filters were attached so that they simulated a  
165 polarization pattern that was shifted by  $90^\circ$  relative to the natural one. The e-vectors in the  
166 two windows on the longitudinal axis (“northern” and “southern” window) were aligned  
167 horizontally, while the e-vectors on the lateral axis (“western” and “eastern” window) were  
168 aligned vertically.

169 The cages were aligned so that the “western” window always pointed towards the  
170 actual azimuth direction of the sunset. Thus, the cages were not exactly aligned along the  
171 cardinal directions, but instead relative to the sunset position. In both boxes, the overhead  
172 region of the sky was blocked from view within approximately  $\pm 30^\circ$  of the zenith, so that the  
173 bird had only reduced access to overhead cues of polarized light. We used only glue for fixing  
174 and did not use any metal to construct the boxes or cages to prevent any influences of metal  
175 components on the magnetic senses of the birds.

176

## 177 Radio tracking

178 Radio transmitters were constructed by the Swiss Ornithological Institute in cooperation with  
179 the University of Applied Sciences Bern, Switzerland (Naef-Daenzer et al., 2005). Radio

180 transmitters, including battery and harness, weighed 0.8 g. The transmitters were attached to  
181 wheatears using a Rappole-Tipton-type harness made from 0.5 mm elastic cord (Rappole and  
182 Tipton, 1990). Length of leg-loops was adjusted individually to birds (Naef-Daenzer, 2007).  
183 Since the lowest body mass of the tested wheatears was 20.9 g (mean±s.d., 29.8±3.8 g,  
184  $N=42$ ), the mass of the radio transmitter represented less than 3.8% (mean: 2.7%) of the  
185 birds' body mass. The relative load was, therefore, below the recommended 5% limit  
186 (Cochran, 1980; Caccamise and Hedin, 1985). Potential adverse effects on the birds'  
187 behaviour are insubstantial (Naef-Daenzer et al., 2001; Rae et al., 2009), and the increase in  
188 flight costs is small (Irvine et al., 2007), though drag (Bowlin et al., 2010; Pennycuick et al.,  
189 2011) as well as energy expenditure (Barron et al., 2010) increase. Transmitter life was about  
190 30 days.

191 We used Yagi 3EL2 hand-held antennas (Vårgårda, Sweden) in combination with FT-  
192 290RII receivers (Yaesu, Japan) to track the two birds per night. The detection range of the  
193 radio transmitters was approximately 12–15 km (Schmaljohann et al., 2011; Schmaljohann  
194 and Naef-Daenzer, 2011).

195 In those cases where the birds did not immediately depart from the island after release,  
196 their location on the island was estimated by triangulation from subsequent observer  
197 positions. During all departure events, the birds were radio-tracked from the “Oberland”, the  
198 highest area on the island elevated 50–60 m above sea level. Departing birds were recorded  
199 until loss of signal. According to the series of bearings of the departing birds, they left  
200 Helgoland in a straight line. We used the last recorded direction before loss of signal as the  
201 departure direction. The bearing accuracy of this method is  $3\pm 5^\circ$  (mean±s.d.,  $N=49$ ), see  
202 Schmaljohann et al. (2011). In the mornings after a departure, the whole island was searched  
203 to see whether any departed bird had returned to the island, but no bird did so.

204 The birds' flight altitude could not be estimated with the radio telemetry method used.  
205 As the island is very small, a potential parallax error in direction estimates is small compared  
206 to the bearing accuracy of hand-held antennas (Kenward, 2001). Set-off distance between bird  
207 and observer was  $< 500$  m (see above); the parallax error in respect to a tracking distance of  
208 15 km would be  $< 2^\circ$ .

209 From the start of exposure, we estimated cloud cover [x/8], visibility [0=horizon,  
210 1=not to the horizon but beyond the dune ( $> 2.5$  km), 2=to the dune (c. 1.5 km), 3=not to the  
211 dune ( $< 1.5$  km)] and the rainfall [0=no rain, 1=shower of rain, 2=continuous rain] every hour  
212 on the hour and at departure events.

213

214 Departure fuel load and potential flight range

215 Individual lean body mass  $m_0$  (g) was estimated following Schmaljohann and Naef-Daenzer  
216 (2011) as:

217

$$218 \quad m_0 = 0.29 \cdot \omega - 6.85 \quad (1),$$

219

220 where  $\omega$  is the individual wing length (mm).

221

222 Individual departure fuel load  $f$  relative to bird's lean body mass  $m_0$  was calculated using  
223 bird's departure body mass  $m$  taken just before radio tagging as:

224

$$225 \quad f = (m - m_0) / m_0 \quad (2).$$

226

227 Bird's potential flight range  $Y$  is a function of the individual departure fuel load  $f$  (Delingat  
228 et al., 2008):

229

$$230 \quad Y = 100 \cdot U \cdot \ln(1 + f) \quad (3),$$

231

232 where  $U$  is wheatear's airspeed of 47 km h<sup>-1</sup> (Bruderer and Boldt, 2001).

233

## 234 **Statistics**

235 Statistics were calculated using the statistical software package R (R Development Core  
236 Team, 2011). Directions were tested for uniformity with the Rayleigh test of uniformity  
237 (Jammalamadaka and SenGupta, 2001). Circular-circular and circular-linear correlations  
238 were calculated according to the methods described by (Jammalamadaka and SenGupta,  
239 2001). The P-value for a circular-linear correlation was estimated by a randomization test  
240 with 10000 runs each, see Crawley (2005) and Schmaljohann and Naef-Daenzer (2011).

241

242

## 243 **RESULTS**

### 244 **Conditions of experimental and control-birds**

245 Eight experiments were carried out in 2008 and 13 in 2009. None of the variables for body  
246 condition differed significantly between experimental and control-birds, all Wilcoxon tests for



247 paired samples:  $P > 0.22$ : wing length (experimental birds: mean  $\pm$  s.d.,  $99.6 \pm 3.8$  mm,  $N = 21$ ;  
248 control-birds:  $101.7 \pm 3.6$  mm,  $N = 21$ ), fat score ( $4.0 \pm 0.67$ ;  $3.8 \pm 0.77$ ), departure body mass  
249 ( $29.8 \pm 3.7$  g;  $29.7 \pm 4.1$  g) and departure fuel load ( $0.34 \pm 0.13$ ;  $0.32 \pm 0.15$ ). The potential flight  
250 ranges, which all were sufficient to reach the nearest mainland at a distance of 50 km, did not  
251 differ between groups (experimental birds:  $1350 \pm 445$  km; control-birds:  $1276 \pm 529$  km;  
252 Wilcoxon test for paired sample:  $V = 130$ ,  $P = 0.63$ ). Between year comparisons did not reveal  
253 any significant difference in wing length and fat score (Mann Whitney U-test:  $P > 0.83$ ), but in  
254 departure body mass (2008:  $28 \pm 4.0$ ,  $N = 16$ ; 2009:  $31 \pm 3.2$ ,  $N = 26$ ), departure fuel load  
255 ( $0.25 \pm 0.13$ ;  $0.38 \pm 0.12$ ) and consequently flight range ( $1022 \pm 491$  km;  $1492 \pm 391$  km; Mann  
256 Whitney U-tests:  $P < 0.02$ ).

257

### 258 Departure events

259 37 of the 42 wheatears departed in the course of the night of the experiment. Three  
260 experimental and two control-birds remained on the island for another day. We determined  
261 the departure direction for 33 ( $N_{\text{experiment}} = 17$ ,  $N_{\text{control}} = 16$ ) and tracked the duration of the  
262 departure until loss of signal for 31 ( $N_{\text{experiment}} = 17$ ,  $N_{\text{control}} = 14$ ) out of these 37 departing  
263 wheatears. The tracking duration could not be estimated for two control-birds, because the  
264 onset of their departure flights remained unclear. In 13 experiments both the experimental and  
265 control-bird departed from Helgoland during the same night of the experiment allowing pair-  
266 wise comparisons between experimental and control-birds. There was no significant  
267 difference in the tracking duration of the departure events between experimental and control-  
268 birds (mean  $\pm$  s.d.,  $17 \pm 6$  min,  $N = 17$ ;  $17 \pm 6$  min,  $N = 14$ ; Mann Whitney U-test:  $W = 114$ ,  $P = 0.86$ ;  
269 pair wise comparison:  $18 \pm 6$  min;  $17 \pm 6$  min; Wilcoxon test for paired sample:  $V = 33$ ,  $P = 1$ ,  
270  $N = 11$ ). Overall, the birds were tracked after setting off for  $17 \pm 6$  min ( $N = 31$ ). This together  
271 with an assumed airspeed of  $13 \text{ m s}^{-1}$  ( $47 \text{ km h}^{-1}$ ) indicated a mean detection range of the  
272 radio transmitters of  $13 \pm 4$  km ( $N = 31$ ).

273 Wheatears departed from the island between 3 and 270 min after they were released  
274 from the orientation cages (experimental birds: mean  $\pm$  s.d.,  $104 \pm 74$  min,  $N = 17$ ; control-birds:  
275  $88 \pm 65$  min,  $N = 14$ ; Mann Whitney U-test:  $W = 133$ ,  $P = 0.60$ ; pair wise comparison:  $106 \pm 82$   
276 min;  $82 \pm 60$  min; Wilcoxon test for paired sample:  $V = 46$ ,  $P = 0.28$ ,  $N = 11$ ). There was no  
277 significant difference between the experimental and control-birds in the timing of departure in  
278 respect to sunset (experimental birds: mean  $\pm$  s.d.,  $215 \pm 60$  min,  $N = 17$ ; control-birds:  $185 \pm 41$   
279 min,  $N = 14$ ; Mann Whitney U-test:  $W = 148$ ,  $P = 0.26$ ; pair wise comparison:  $214 \pm 69$  min;  
280  $190 \pm 37$  min; Wilcoxon test for paired sample:  $V = 46$ ,  $P = 0.28$ ,  $N = 11$ ).

281

## 282 Departure directions

283 The mean departure direction of the experimental birds was unimodally orientated towards  
284  $141^\circ$  (Rayleigh test of uniformity:  $R=0.54$ ,  $P<0.0001$ ,  $N=17$ ; Fig. 3) and direction of control-  
285 birds towards  $154^\circ$  (Rayleigh test of uniformity:  $R=0.78$ ,  $P<0.0001$ ,  $N=16$ ; Fig. 3). Departure  
286 directions and angular dispersion around the corresponding means did not differ significantly  
287 between both groups (Watson-Williams test:  $F_{1,31}=0.43$ ,  $P=0.52$ ; Wallraff test: Kruskal-  
288 Wallis- $\chi_1^2=1.33$ ,  $P=0.25$ ), also when considering only nights in which both the experimental  
289 ( $180^\circ$ ; Rayleigh test of uniformity:  $R=0.52$ ,  $P=0.026$ ,  $N=13$ ) and control-bird ( $159^\circ$ ; Rayleigh  
290 test of uniformity:  $R=0.74$ ,  $P=0.0003$ ,  $N=13$ ) departed (Watson-Williams test:  $F_{1,24}=0.02$ ,  
291  $P=0.88$ ; Wallraff test: Kruskal-Wallis- $\chi_1^2=0.9$ ,  $P=0.34$ ).

292 When each departure direction of the experimental birds was plotted as the deviation  
293 from its corresponding control-bird, the deviations were uniformly distributed and not  
294 significantly different from zero. Mean deviation was  $4^\circ$  (95% CI:  $338^\circ-33^\circ$ ; Rayleigh test of  
295 uniformity:  $R=0.71$ ,  $P<0.001$ ,  $N=13$ ; Fig. 4). Absolute deviation was  $40^\circ$  (95% CI:  $26^\circ-53^\circ$ ;  
296 Rayleigh test of uniformity:  $R=0.91$ ,  $P<0.001$ ,  $N=13$ ; Fig. 4) and therefore, significantly  
297 different from an expected  $90^\circ$  shift.

298 Wind direction, wind speed, cloudiness and visibility at departure did not explain the  
299 variation in the departure direction of experimental and control-birds (circular~circular  
300 correlation:  $P=0.32$ , circular~linear correlations all:  $F_{2,11}<1.1$ ,  $P>0.6$ ,  $N=13$ ). Departure fuel  
301 load did neither affect the departure direction of experimental nor of control-birds (circular-  
302 linear correlation: experimental birds:  $F_{2,15}\approx 3.49$ ,  $P=0.21$ ,  $N=17$ ; control-birds:  $F_{2,14}\approx 0.76$ ,  
303  $P=0.70$ ,  $N=16$ ) also when considering only birds departing within the same night  
304 (experimental birds:  $F_{2,11}\approx 2.97$ ,  $P=0.27$ ,  $N=13$ ; control-birds:  $F_{2,11}\approx 0.36$ ,  $P=0.85$ ,  $N=13$ ).  
305 Departure time after release was significantly correlated with departure fuel load in  
306 experimental birds ( $R_S=-0.50$ ,  $P=0.043$ ,  $N=17$ ) indicating that birds with slightly higher  
307 departure fuel loads set off earlier in the night after being released than birds with lower  
308 departure fuel load. This was not true for control-birds ( $R_S=0.16$ ,  $P=0.59$ ,  $N=16$ ). Regarding  
309 the birds setting off on the same night, departure time after release did neither correlate with  
310 departure fuel load in experimental ( $R_S=-0.41$ ,  $P=0.16$ ,  $N=13$ ) nor in control-birds ( $R_S=0.04$ ,  
311  $P=0.92$ ,  $N=13$ ). There was no seasonal effect on departure direction (circular-linear  
312 correlation, experimental birds:  $F_{2,15}\approx 0.88$ ,  $P=0.65$ ,  $N=17$  and  $F_{2,11}\approx 1.30$ ,  $P=0.55$ ,  $N=13$ ;  
313 control-birds:  $F_{2,14}\approx 0.20$ ,  $P=0.91$ ,  $N=16$  and  $F_{2,11}\approx 0.15$ ,  $P=0.92$ ,  $N=13$ ).

314

315

## 316 DISCUSSION

317 The experimental and control-birds departed both consistently in south-southeasterly  
318 directions with no significant difference in the bearing between the groups (Figs 3, 4). A  
319 similar migratory direction was expected from earlier evidence on autumn migration by ring  
320 recoveries pointing towards south-southwest from Helgoland (Dierschke et al., 2011). Hence,  
321 we found no compass recalibration as a result of the exposure to the cue conflict between the  
322 natural magnetic field and an artificially shifted polarization pattern at sunset. In the case of  
323 recalibration, we would have expected a difference in the departure directions between the  
324 experimental and control-birds of about 90°, either as a bimodal distribution (towards -90°  
325 and +90°, cf. Muheim et al., 2006b) or a unimodal distribution (either towards -90° or +90°;  
326 Figs 1, 4). Such shifts in orientation has been observed in Savannah (*Passerculus*  
327 *sandwichensis*) and white-throated sparrows (*Zonotrichia albicollis*) tested in Emlen funnels  
328 (Muheim et al., 2006b, 2009) and in free-flying *Catharus* thrushes (Cochran et al., 2004) after  
329 experiencing similar cue conflict exposures. In these cases, the birds calibrated their magnetic  
330 compass from the experienced sunset cues.

331 Our study is in agreement with a number of recent studies that did not find an effect of  
332 cue conflict exposures on the orientation of the corresponding study species (Wiltschko et al.  
333 2008a, Wiltschko et al. 2008b, Gaggini et al. 2010, Chernetsov et al., 2011; but see Muheim  
334 et al. 2008). Similar to our study, the authors reported no compass calibration, but instead a  
335 simple domination of magnetic or stellar cues over the sunset cues (Chernetsov et al., 2011).

336 Possible explanations for our results include that the experimental birds either did not  
337 calibrate any of their compasses and showed (i) a domination of the magnetic compass or (ii)  
338 a domination of the celestial compasses (most likely the star compass) when departing from  
339 Helgoland, or alternatively that they (iii) recalibrated the celestial (sunset) compass by  
340 magnetic cues and then used the magnetic compass to determine the departure direction, or  
341 that they showed (iv) a recalibration of the magnetic compass by the polarized light cues and  
342 then used their star compass to determine the departure direction. Thus, to be able to make the  
343 distinction between these four possibilities, we would need to know which compass the  
344 wheatears used when they determined their departure direction from Helgoland, i.e., whether  
345 they relied on the magnetic or a celestial compass. The study by Cochran et al. (2004)  
346 indicated that birds use their magnetic compass when departing at night after all sunset cues  
347 had disappeared. Eleven of our wheatears (6 experimental and 5 control-birds) set off under  $\geq$   
348 4/8 overcast conditions showing no unusual departure directions (mean: 131°, 95% CI 85–

349 169°) in comparison to the others (mean: 155°, 95% CI 137–177°,  $N=22$ ). Their departure  
350 directions and angular dispersion around the corresponding means did not significantly differ  
351 between the two groups (Watson-Williams test:  $F_{1,31}=1.29$ ,  $P=0.26$ ; Wallraff test: Kruskal-  
352 Wallis- $\chi^2_1=0.21$ ,  $P=0.65$ ). Thus, also our wheatears may have primarily used their magnetic  
353 compass to determine their departure direction, supporting the hypothesis that the magnetic  
354 compass might be dominant over the celestial compasses. However, this still does not allow  
355 us to discriminate between scenario (i) and (iii), i.e., to determine whether the birds did not  
356 calibrate any of their compasses, disregarding the conflicting cues during the cue conflict  
357 exposure (i), or whether they recalibrated the celestial compasses relative to magnetic cues  
358 during the exposure to the cue conflict between the natural magnetic field and the artificially  
359 shifted polarization pattern at sunset (iii).

360 Explanations for the possible lack of calibration of any of the compass systems during  
361 the experiment on Helgoland may or may not be related to hypotheses of a reversed cue  
362 hierarchy (Muheim et al., 2008; Wiltschko et al., 2008a; Wiltschko et al., 2008b). It is highly  
363 unlikely that the wheatears' migratory state can explain the ignorance of the cue conflict, as  
364 departure directions of both groups agreed with the general seasonally appropriate migration  
365 direction based on ring-recoveries (Dierschke et al., 2011). The birds were released at higher  
366 sun elevations than they generally depart, and the timing of departure with respect to sunset  
367 was within the range of their natural departures from Helgoland, although this reference data  
368 refers to spring migration (Schmaljohann et al., 2011; Schmaljohann and Naef-Daenzer,  
369 2011). Both the experimental and control-birds did not differ in their physiological condition,  
370 their potential flight range and their timing of departure demonstrating clearly that the  
371 individuals of both groups did not differ in any apparent factor influencing their departure  
372 direction. Thus, we doubt that these factors might have driven wheatears to not calibrate their  
373 compass systems.

374 A potential biasing influence of the island and the sea as an ecological barrier for  
375 small land birds is also an unlikely explanation for the lack of response to the cue conflict.  
376 Birds have been shown to react to an upcoming ecological barrier by a change in their  
377 migration direction (Meyer et al., 2000), but the strength of this reaction depends strongly on  
378 birds' body condition (Sandberg and Moore, 1996; Sandberg, 2003; Deutschlander and  
379 Muheim, 2009; Schmaljohann et al., 2011; Schmaljohann and Naef-Daenzer, 2011). Lean  
380 birds avoid crossing ecological barriers, whereas fit birds do migrate across large ecological  
381 barriers (Schmaljohann and Naef-Daenzer, 2011). As all wheatears had on average potential  
382 flight ranges of more than 1000 km, and as departure fuel load did not affect departure

383 direction in this study, the effect of the upcoming sea barrier on wheatears' departure  
384 direction was most probably low, cf. Schmaljohann and Naef-Daenzer (2011). Likewise, the  
385 landscape of the Courish Spit did not seem to influence the take-off directions of song  
386 thrushes in a cue conflict experiment in comparison to the inland site of the same study  
387 (Chernetsov et al., 2011).

388 We are confident that we can exclude problems with the experimental set-up, as the  
389 experiments were carried out as in Muheim et al. (2006b), except that the birds were radio  
390 tracked and experienced a longer cue conflict exposure, on average 167 min as compared to  
391 60 min in Muheim et al. (2006b, 2009). Possibly, the wheatears were stressed because of the  
392 longer stay in the exposure cages compared to other studies, e.g., Muheim et al. (2006b),  
393 Wiltschko et al. (2008a) and Muheim et al. (2009). However, in Cochran et al.'s (2004) study,  
394 the birds experienced equally long exposure times, but with the difference that Cochran et al.  
395 (2004) exposed their birds to a shifted magnetic field under the natural sky, whereas we  
396 exposed the birds in an artificially shifted polarization pattern in the natural magnetic field.  
397 As the e-vector of the band of maximum polarization vertically intersects the horizon only at  
398 the exact times of sunrise and sunset (the orientation axis of the e-vector at any point in the  
399 sky at a  $\pm 90^\circ$  angle to the sun is always perpendicular to the beeline to the sun), the birds may  
400 have become confused by seeing this vertically aligned pattern at times far from sunset, and  
401 therefore may have decided to ignore the pattern.

402 We cannot exclude that the birds at certain locations or under certain environmental  
403 conditions pay no attention to conflicting compass cues altogether, e.g., after reaching a  
404 transit site or an emergency land site where they do not intend to stop over. Likewise, in areas  
405 with prominent landmarks or geographic features, the birds may calibrate their compasses  
406 with each other upon arrival to the new site and then transfer the calibration information to  
407 these landmark features and ignore consecutive cue conflicts. In our case, the wheatears very  
408 likely had time to explore the island and probably even calibrate their compasses before  
409 capture, because our catching effort does not justify assuming that wheatears were trapped on  
410 their first day of arrival. When then exposed to the cue conflict in this familiar landscape, they  
411 might have decided to simply ignore the conflicting cues, as has been suggested by Muheim  
412 et al. (2008) as the reason for the ignorance of the silvereyes (*Zosterops lateralis*) in the study  
413 by Wiltschko et al. (2008a).

414 Additionally, the calibration process might be a mechanism operating at the scale of  
415 several days and/or calibration's outcome result might be verified during each sunset and  
416 sunrise event so that solitary appearing aberrant cues are of no consequence for the general

417 orientation towards the seasonally appropriate migratory direction. Such an inert mechanism  
418 would yield a relative robust way of calibrating the compass systems. However, if this is true,  
419 we still need explaining why single cue conflicting events let to a recalibration of the compass  
420 systems in former studies.

421

## 422 Conclusions

423 The lack of a response to the cue conflict exposure between the natural magnetic field and the  
424 artificially shifted polarization pattern at sunset most likely indicates a simple domination of  
425 one of the compasses, most likely the magnetic compass, over the other cues and an ignorance  
426 of the cue conflict. Possible reasons for the lack of response to the cue conflict could be  
427 manifold. However, three hypotheses resulting from our experiment are that (1) the  
428 calibration process may operate at a slower pace, (2) the calibration process may be more  
429 robust than formerly anticipated or (3) the rate of calibration may differ amongst species (Liu  
430 and Chernetsov, 2012).

431

## 432 ACKNOWLEDGEMENTS

433 We are most grateful to Eric Diener, Vera Knöfler and Wiebke Plötner for their assistance during field work.  
434 They braved many uncomfortable hours with us during the nocturnal telemetry shifts. We thank Ommo Hüppop,  
435 Freimut Schramm and several volunteers of the Institute of Avian Research ‘Vogelwarte Helgoland’ for their  
436 support during the field studies. The authors are very grateful to Ulric Lund for his advice on circular statistics.  
437 Lukas Jenni and two anonymous reviewers kindly provided helpful comments on the manuscript. Wheatears  
438 were caught, ringed and radio tagged under licence of the Ministry for Agriculture, the Environment and Rural  
439 Areas, Schleswig-Holstein, Germany.

440

## 441 REFERENCES

- 442 **Able, K. P.** (1982). Skylight polarization patterns at dusk influence migratory orientation in  
443 birds. *Nature* **299**, 550-551.
- 444 **Able, K. P. and Able, M. A.** (1993). Daytime calibration of magnetic orientation in a  
445 migratory bird requires a view of skylight polarization. *Nature* **364**, 523-525.
- 446 **Bairlein F.** (1994). *Manual of Field Methods. European-African Songbird Migration.*  
447 Wilhelmshaven: Institut für Vogelforschung.
- 448 **Barron, D. G., Brawn, J. D. and Weatherhead, P. J.** (2010). Meta-analysis of transmitter  
449 effects on avian behaviour and ecology. *Meth. Ecol. Evol.* **1**, 180-187.
- 450 **Bowlin, M. S., Henningson, P., Muijres, F. T., Vleugels, R. H. E., Liechti, F. and**  
451 **Hedenström, A.** (2010). The effects of geolocator drag and weight on the flight  
452 ranges of small migrants. *Meth. Ecol. Evol.* **1**, 398-402.

- 453 **Bruderer, B., and Boldt, A.** (2001). Flight characteristics of birds: I. radar measurements of  
454 speeds. *Ibis* **143**, 178-204.
- 455 **Caccamise, D. F., and Hedin, R. S.** (1985). An aerodynamic basis for selecting transmitter  
456 loads in birds. *Wilson Bulletin* **97**, 306-318.
- 457 **Chernetsov, N., Kishkinev, D., Kosarev, V. and Bolshakov, C. V.** (2011). Not all songbirds  
458 calibrate their magnetic compass from twilight cues: a telemetry study. *J. Exp. Biol.*  
459 **214**, 2540-2543.
- 460 **Cochran, W. W.** (1980). Wildlife telemetry. In *Wildlife management techniques manual* (ed.  
461 S. Schemnitz), pp. 507-520. Washington: The Wildlife Society.
- 462 **Cochran, W. W., Mouritsen, H. and Wikelski, M.** (2004). Migrating songbirds recalibrate  
463 their magnetic compass daily from twilight cues. *Science* **304**, 405-408.
- 464 **Crawley M. J.** (2005). *Statistical Computing. An Introduction to Data Analysis using S-Plus.*  
465 West Sussex: Wiley.
- 466 **Delingat, J., Bairlein, F. and Hedenström, A.** (2008). Obligatory barrier crossing and  
467 adaptive fuel management in migratory birds: the case of the Atlantic crossing in  
468 Northern Wheatears (*Oenanthe oenanthe*). *Behav. Ecol. Sociobiol.* **62**, 1069-1078.
- 469 **Deutschlander, M. E. and Muheim, R.** (2009). Fuel reserves affect migratory orientation of  
470 thrushes and sparrows both before and after crossing an ecological barrier near their  
471 breeding grounds. *J. Avian Biol.* **40**, 1-5.
- 472 **Dierschke J., Dierschke, V., Hüppop, K., Hüppop, O. and Jachmann, K. F.** (2011). *Die*  
473 *Vogelwelt der Insel Helgoland*. OAG Helgoland: Helgoland.
- 474 **Emlen, S. T. and Emlen, J. T.** (1966). A technique for recording migratory orientation of  
475 captive birds. *Auk* **83**, 361-367.
- 476 **Emlen, S. T. and Demong, N. J.** (1978). Orientation strategies used by free-flying bird  
477 migrants: A radar tracking study. In: *Animal migration, navigation and homing* (eds.  
478 K. Schmidt-Koenig and W. T. Keeton), pp. 283-294. Heidelberg: Springer.
- 479 **Erni, B., Liechti, F., Underhill, L. G. and Bruderer, B.** (2002). Wind and rain govern the  
480 intensity of nocturnal bird migration in central Europe - a log-linear regression  
481 analysis. *Ardea* **90**, 155-166.
- 482 **Gaggini, V., Baldaccini, N., Spina, F. and Giunchi, D.** (2010). Orientation of the pied  
483 flycatcher *Ficedula hypoleuca* cue-conflict experiments during spring migration.  
484 *Behav. Ecol. Sociobiol.* **64**, 1333-1342.

- 485 **Hegedüs, R., Åkesson, S. and Horváth, G.** (2007). Polarization patterns of thick clouds:  
486 overcast skies have distribution of the angle of polarization similar to that of clear  
487 skies. *J. Opt. Soc. Am. A* **24**, 2347-2356.
- 488 **Irvine, R. J., Leckie, F. M. and Redpath, S. M.** (2007). The cost of carrying radio-  
489 transmitters: a test with homing pigeons. *Wildl. Biol.* **13**, 238-243.
- 490 **Jammalamadaka S. R., and SenGupta, A.** (2001). *Topics in Circular Statistics*. Singapore:  
491 World Scientific Publishing.
- 492 **Kaiser, A.** (1993). A new multi-category classification of subcutaneous fat deposits of  
493 songbirds. *J. Field Ornithol.* **64**, 246-255.
- 494 **Kenward, R. E.** (2001). *A Manual for Wildlife Radio Tagging*. London: Academic Press.
- 495 **Liu, X. and Chernetsov, N.** (2012). Avian orientation: multi-cue integration and calibration  
496 of compass systems. *Chinese Birds* **3**, 1-8.
- 497 **Meyer, S. K., Spaar, R. and Bruderer, B.** (2000). To cross the sea or to follow the coast?  
498 Flight directions and behaviour of migrating raptors approaching the Mediterranean  
499 Sea in autumn. *Behav.* **137**, 379-399.
- 500 **Moore, F. R.** (1987). Sunset and the orientation behaviour of migrating birds. *Biol. Rev.* **62**,  
501 65-86.
- 502 **Muheim, R., Moore, F. R. and Phillips, J. B.** (2006a). Calibration of magnetic and celestial  
503 compass cues in migratory birds - a review of cue-conflict experiments. *J. Exp. Biol.*  
504 **209**, 2-17.
- 505 **Muheim, R., Phillips, J. B. and Åkesson, S.** (2006b). Polarized light cues underlie compass  
506 calibration in migratory songbirds. *Science* **313**, 837-839.
- 507 **Muheim, R., Åkesson, S. and Phillips, J.** (2007). Magnetic compass of migratory Savannah  
508 sparrows is calibrated by skylight polarization at sunrise and sunset. *J. Ornithol.* **148**,  
509 485-494.
- 510 **Muheim, R., Åkesson, S. and Phillips, J.** (2008). Response to R. Wiltschko et al. (J.  
511 Ornithol.): Contradictory results on the role of polarized light in compass calibration  
512 in migratory songbirds. *J. Ornithol.* **149**, 659-662.
- 513 **Muheim, R., Phillips, J. B. and Deutschlander, M. E.** (2009). White-throated sparrows  
514 calibrate their magnetic compass by polarized light cues during both autumn and  
515 spring migration. *J. Exp. Biol.* **212**, 3466-3472.
- 516 **Naef-Daenzer, B.** (2007). An allometric function to fit leg-loop harnesses to terrestrial birds.  
517 *J. Avian Biol.* **38**, 404-407.



- 518 **Naef-Daenzer, B., Widmer, F. and Nuber, M.** (2001). A test for effects of radio-tagging on  
519 survival and movements of small birds. *Avian Science* **1**, 15-23.
- 520 **Naef-Daenzer, B., Früh, D. , Stalder, M., Wetli, P. and Weise, E.** (2005). Miniaturization  
521 (0.2 g) and evaluation of attachment techniques of telemetry transmitters. *J. Exp. Biol.*  
522 **208**, 4063-4068.
- 523 **Nievergelt, F., and Liechti, F.** (2000). Methodische Aspekte zur Untersuchung der  
524 Zugaktivität im Emlen-Trichter. *J. Ornithol.* **141**, 180-190.
- 525 **Nievergelt, F., Liechti, F. and Bruderer, B.** (1999). Migratory directions of free-flying birds  
526 versus orientation in registration cages. *J. Exp. Biol.* **202**, 2225-2231.
- 527 **Pennycuik, C. J., Fast, P. L. F., Ballerstädt, N. and Rattenborg, N. C.** (2011). The effect  
528 of an external transmitter on the drag coefficient of a bird's body, and hence on  
529 migration range, and energy reserves after migration. *J. Ornithol.* **153**, 633-644.
- 530 **Phillips, J., and Moore, F. R.** (1992). Calibration of the sun compass by sunset polarized  
531 light patterns in a migratory bird. *Behav. Ecol. Sociobiol.* **31**, 189-193.
- 532 **R Development Core Team 2011R** (2011). A language and environment for statistical  
533 computing. R Foundation for Statistical Computing. Vienna. Available at:  
534 <http://www.R-project.org>.
- 535 **Rae, L. F., Mitchell, G. W., Mauck, R. A., Guglielmo, C. G. and Norris, D. R.** (2009).  
536 Radio transmitters do not affect the body condition of Savannah Sparrows during the  
537 fall premigratory period. *J. Field Ornithol.* **80**, 419-426.
- 538 **Rappole, J. H., and Tipton, A. R.** (1990). New harness design for attachment of radio  
539 transmitters to small passerines. *J. Field Ornithol.* **62**, 335-337.
- 540 **Sandberg, R.** (2003). Stored fat and the migratory orientation of birds. In *Avian Migration*  
541 (eds. P. Berthold, E. Gwinner, and Sonnenschein, E.), pp. 515-525. Berlin: Springer.
- 542 **Sandberg, R., and Moore, F. R.** (1996). Migratory orientation of red-eyed vireos, *Vireo*  
543 *olivaceus*, in relation to energetic condition and ecological context. *Behav. Ecol.*  
544 *Sociobiol.* **39**, 1-10.
- 545 **Sandberg, R., Bäckman, J., Moore, F. R. and Löhmus, M.** (2000). Magnetic information  
546 calibrates celestial cues during migration. *Anim. Behav.* **60**, 453-462.
- 547 **Schmaljohann, H., and Dierschke, V.** (2005). Optimal bird migration and predation risk: a  
548 field experiment with northern wheatears *Oenanthe oenanthe*. *J. Anim. Ecol.* **74**, 131-  
549 138.

- 550 **Schmaljohann, H., and Naef-Daenzer, B.** (2011). Body condition and wind support initiate  
551 shift in migratory direction and timing of nocturnal departure in a free flying songbird.  
552 *J. Anim. Ecol.* **80**, 1115-1122.
- 553 **Schmaljohann, H., Becker, P. J. J., Karaardic, H., Liechti, F., Naef-Daenzer, B. and**  
554 **Grande, C.** (2011). Nocturnal exploratory flights, departure time, and direction in a  
555 migratory songbird. *J. Ornithol.* **152**, 439-452.
- 556 **Schmidt-Koenig, K.** (1990). The sun compass. *Experientia* **46**, 336-342.
- 557 **Svensson L.** 1992. *Identification guide to European passerines*, 4th edition. Stockholm: BTO.
- 558 **Wagner, H. O., and Sauer, F.** (1957). Die Sternorientierung nachtlich ziehender  
559 Grasmucken (*Sylvia atricapilla, borin and curruca*). *Zeitschrift fur Tierpsychologie*  
560 **14**, 29-70.
- 561 **Wiltschko, W., and Wiltschko, R.** (1972). Magnetic compass of European Robins. *Science*  
562 **176**, 62-64.
- 563 **Wiltschko, R., and Wiltschko, W.** (1978). Relative importance of stars and the magnetic  
564 field for the accuracy of orientation in night-migrating birds. *Oikos* **30**, 195-206.
- 565 **Wiltschko, R. and Wiltschko, W.** (1999). Celestial and magnetic cues in experimental  
566 conflict. In *Proc. 22 Int. Ornithol. Congr.* (eds. Adams, N.J. & Slotow, R.H.), pp. 988-  
567 1004. Johannesburg: BirdLife South Africa.
- 568 **Wiltschko, R., and Wiltschko, W.** (2009). **Avian Navigation. *Auk* 126, 717-743.** **Wiltschko,**  
569 **R., Munro, U., Ford, H. and Wiltschko, W.** (2008a). Contradictory results on the  
570 role of polarized light in compass calibration in migratory songbirds. *J. Ornithol.* **149**,  
571 607-614.
- 572 **Wiltschko, R., Munro, U., Ford, H. and Wiltschko, W.** (2008b.) Response to the comments  
573 by R. Muheim, S. akesson, and J.B. Phillips to our paper "Contradictors results on the  
574 role of polarized light in compass calibration in migratory songbirds". *J. Ornithol.*  
575 **149**, 663-664.
- 576 **Zink G.** (1973). *Der Zug europaischer Singvogel. Ein Atlas der Wiederfunde beringter Vogel.*  
577 Moggingen: Vogelzug-Verlag.
- 578

579 **Fig. 1.** Predicted departure directions from the study site, Helgoland (54°11'N, 7°55'E), for  
580 experimental birds which have experienced a 90° shifted band of maximum polarization  
581 during sunset and control-birds, see Materials and Methods for further information. The dot  
582 indicates Helgoland. Sea barrier towards west is 525 km.

583

584 **Fig. 2.** Set-up of orientation experiment, here without birds. Exposure cages were positioned  
585 on a short-grassy hilltop (54°11'13''N, 7°52'30''E) from where birds had a panoramic view  
586 of the horizon, see Materials and Methods for further information. Scale bar is 50 cm. Photo:  
587 Heiko Schmaljohann.

588

589 **Fig. 3.** Detected departure direction of a) experimental birds (mean: 141°, 95% CI: 111–178°;  
590 Rayleigh test of uniformity:  $R=0.54$ ,  $P=0.0056$ ,  $N=17$ ; black circles) and b) of control-birds  
591 (mean: 154°, 95% CI: 135 – 175°; Rayleigh test of uniformity:  $R=0.78$ ,  $P<0.0001$ ,  $N=16$ ; grey  
592 circles; cf. Fig. 1). The mean direction of each distribution is represented by an arrow, whose  
593 length is drawn relative to the radius of the circle=1. Corresponding 95% CIs are given as  
594 dashed lines.

595

596 **Fig. 4.** Deviations from the departure directions of experimental and control-birds of the same  
597 night (filled circles). Positive deviation indicates that experimental bird departed clockwise  
598 from the corresponding control-bird. Negative deviation indicates that the experimental bird  
599 departed anticlockwise from the corresponding control-bird. Mean deviation of the departure  
600 directions was 4° (95% CI: 338–33°; Rayleigh test of uniformity:  $R=0.71$ ,  $P<0.001$ ,  $N=13$ )  
601 and is represented by the thick arrow, whose length is drawn relative to the radius of the  
602 circle=1. Dashed thick lines give corresponding 95% CI. Corresponding absolute deviation  
603 (open circles, drawn slight away from the circumference for sake of clarity) was 40° (95% CI:  
604 26°–53°; Rayleigh test of uniformity:  $R=0.91$ ,  $P<0.001$ ,  $N=13$ ) and is represented by the  
605 narrow arrow, whose length is drawn relative to the radius of the circle=1. Dotted thin lines  
606 give corresponding 95% CI. If the experimental exposure had a significant effect on the  
607 departure direction, the 95% CI of the absolute deviation should include the 90° value.

Predicted directions of

experimental  
birds

control-birds

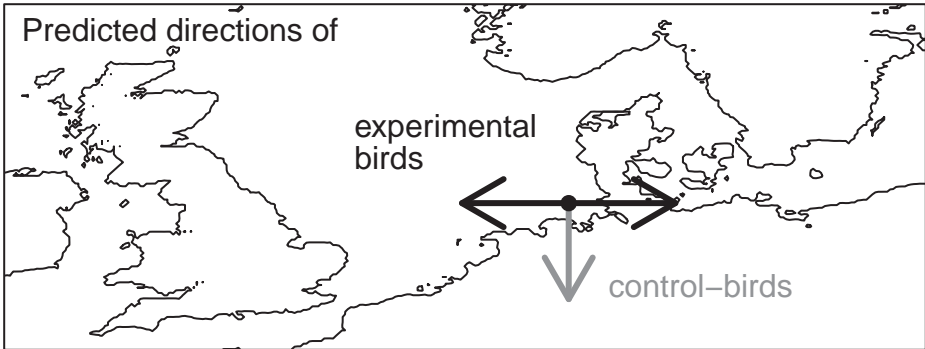

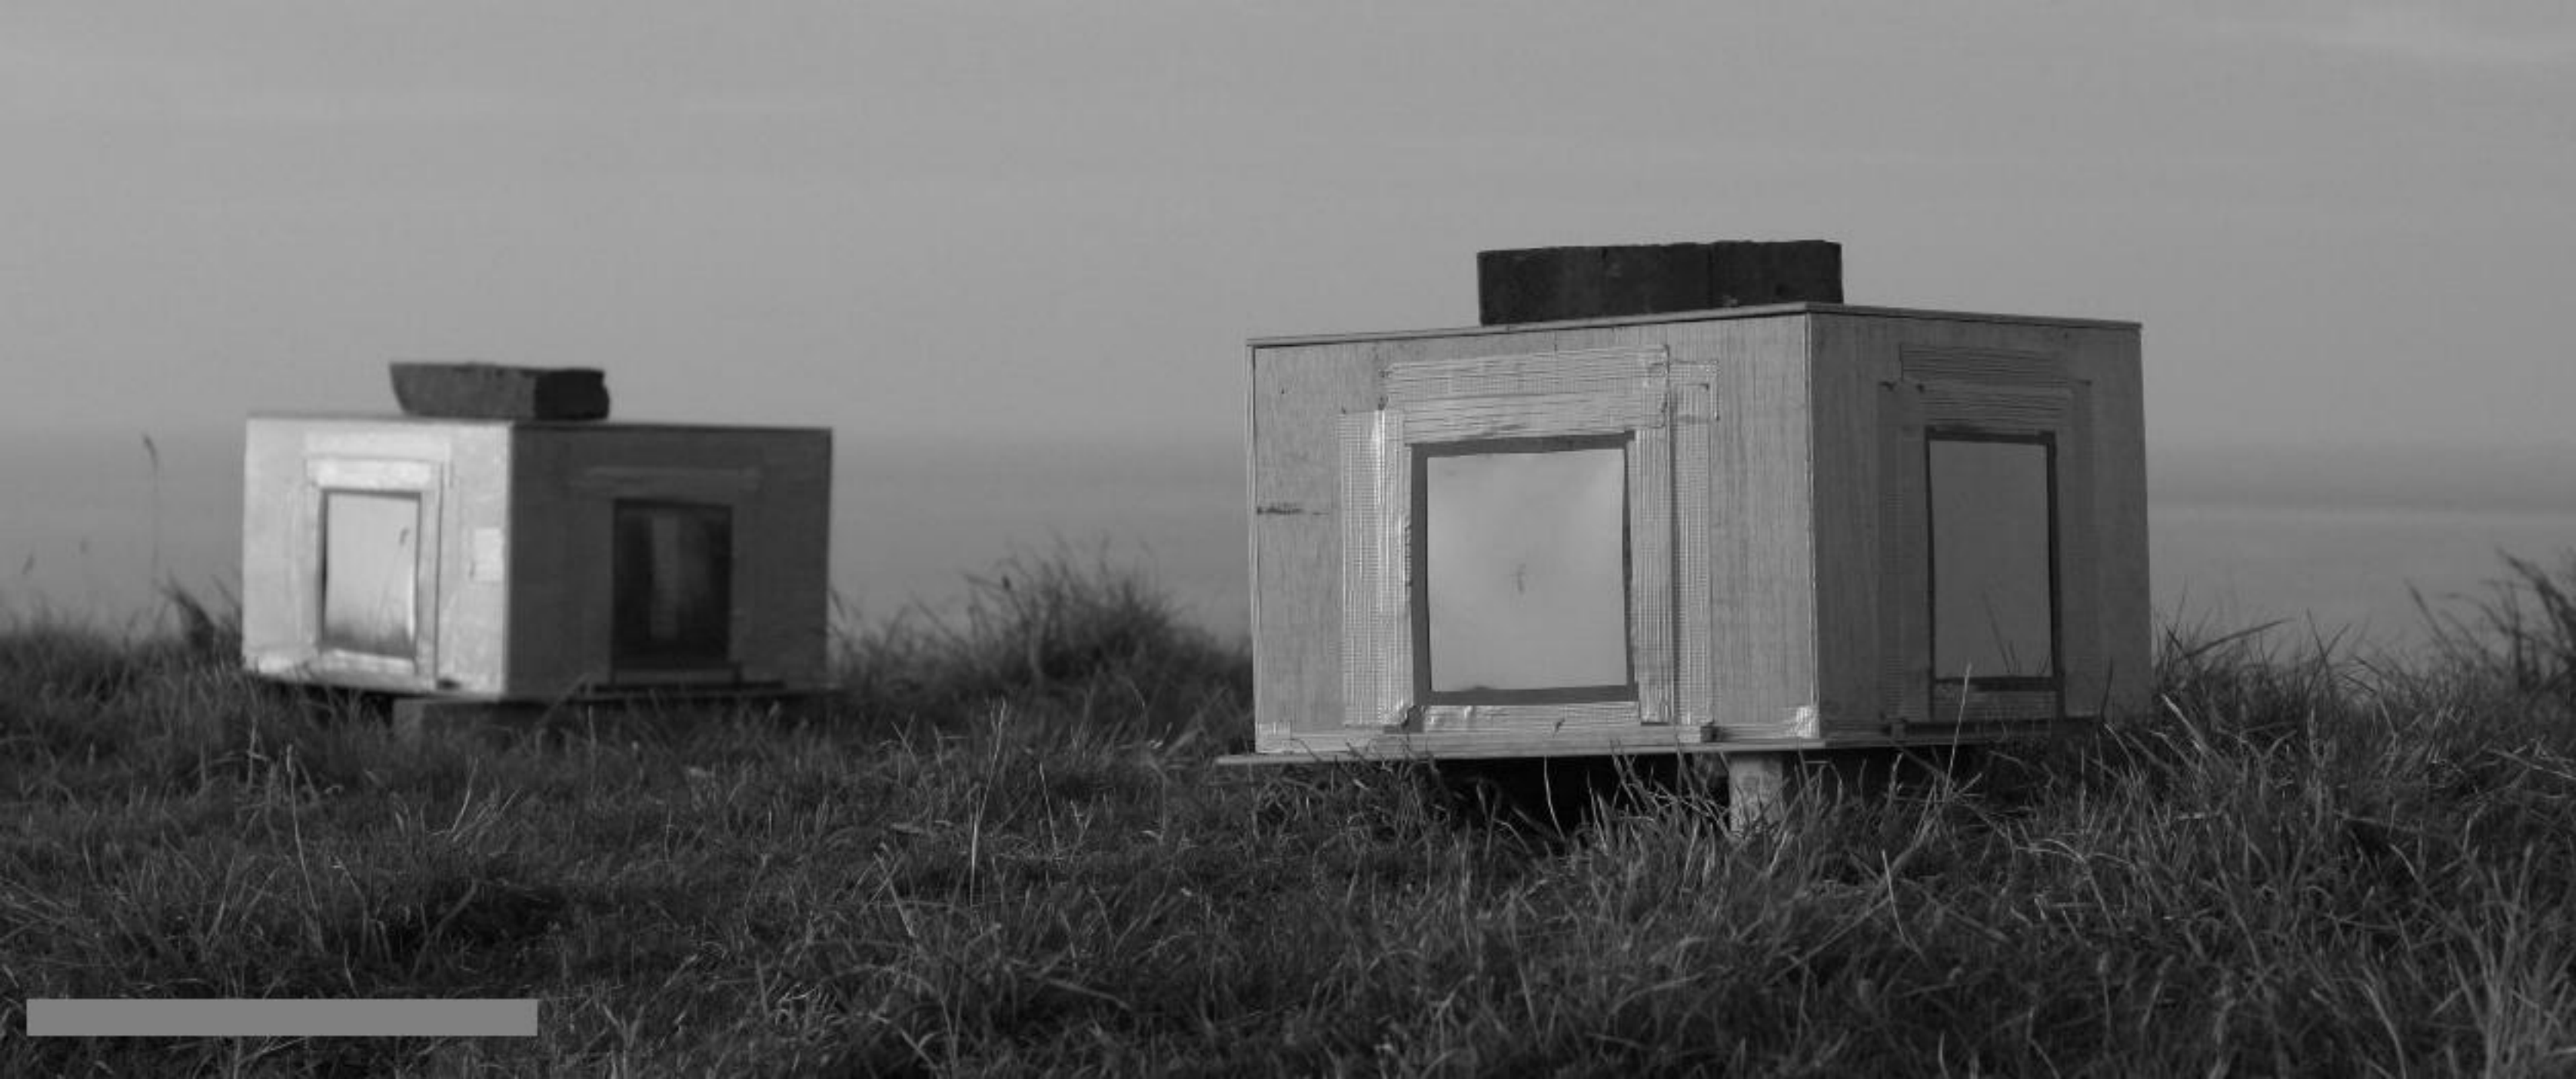

a)

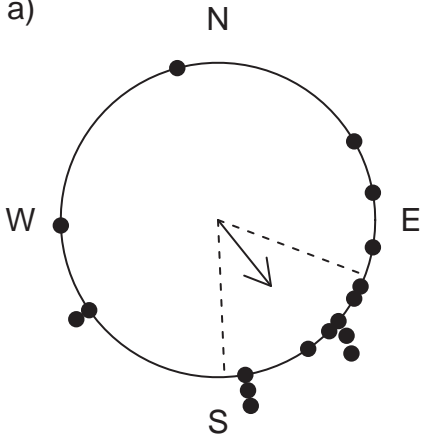

b)

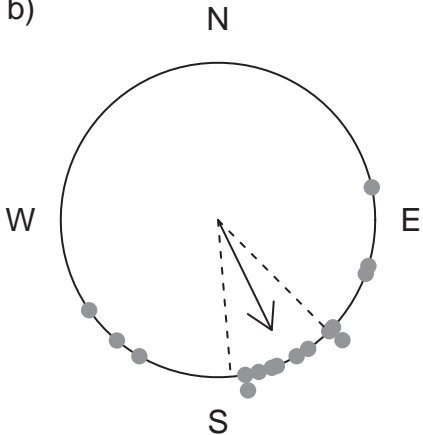

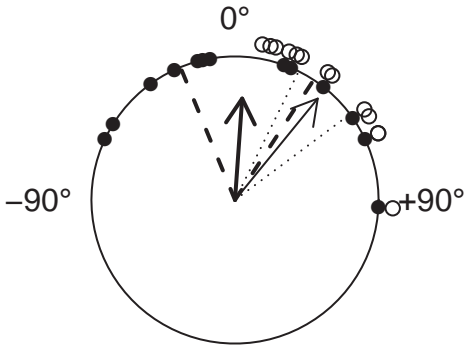

Source: https://cob.silverchair.com/jeb/article-pdf/doi/10.1242/jeb.080580/2036714/jeb_080580.pdf
